# Supplementary material for: Alpha kinase 3 signaling at the M-band maintains sarcomere integrity and proteostasis in striated muscle
Source: PubMed Central journal article supplement (PMC11358020; doi:10.1038/s44161-023-00219-9), 2023-02-15
Supplement: 44161_2023_219_MOESM1_ESM.pdf [file 44161_2023_219_MOESM1_ESM.pdf]

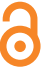

---

# **Alpha kinase 3 signaling at the M-band maintains sarcomere integrity and proteostasis in striated muscle**

---

In the format provided by the authors and unedited

---

## **Oligonucleotide Sequences**

### **Guide RNA sequences**

ALPK3-tdTomato and ALPK3-SBP3XFLAG

5'-GCCCCCAGCCTCTGCGG-3'

ALPK3<sup>L639fs/34</sup>

5'-CCAGGCGCCCGGACACTCA-3'

ALPK3<sup>Q1460X</sup>

5'-GGCCCTGGATGAAGGCAAGC-3'

ALPK3<sup>R1792X</sup>

5'-GATTGCTACCAAACCTCCGA-3'

Mouse Alpk3<sup>W1538X</sup>

5'-TCCAGCACTGGCTGTATCAG-3'

### **Donor repair templates**

ALPK3<sup>L639fs/34</sup>

5'-aggcagtcaggcctcttggggaagagggacccagacTctagtTAGTgggcgctggggagagtccaag  
gggaaggcac-3'

ALPK3<sup>Q1460X</sup>

5'-CGGCGGTCTGGACACAGAGGTGGCCCTGGATGAAGGtAAatAaGAGACACTG  
GCCAAGCCCAGGAAAGCCAAAGACCTGCTGA-3'

ALPK3<sup>R1792X</sup>

5'-TGACTGGAAGATGACTGATGTGCAGATTGCTACCAAgttgtGAGGGTGAGTGG  
TTCTTGGGGACAGAATGCCCTCTGGGCGTC-3'

Mouse Alpk3<sup>W1538X</sup>

5'-CCAGCAGCTCCGAGGCCTTGCAGAAATGCCAAACCTTCCAGCACTGGCTGT  
ATCAGTaGACAAACGGCAGCTTTCTTGTACAGATCTGACAGgtatgaggggtgggggactcacagg  
tgtg-3'

### **Screening Primers**

ALPK3-tdTomato and ALPK3-SBP3XFLAG

External-F: 5'- CTGGGCCAAGTAGAGAGAC-3'

tdTomato-R: 5'-CTCTTTGATGACCTCCTCGCCCT-3'

External-R: 5'- CTCAAGGATGGTTAGTTGCAGG-3'

ALPK3<sup>L639fs/34</sup>

External-F: 5'-TGGGCACTCCAGACAAGG-3'

Screening-F: 5'-gggacccagacTctagtTAGT-3'

External-R: 5'-tgtagctggcactccagtcc-3'

ALPK3<sup>Q1460X</sup>

External-F: 5'-GATTTCTCCCTAAGGTCAGAGC-3'

Screening-F: 5'-TGGCCCTGGATGAAGGtAAatAaG-3'

External-R: 5'-gtgcctcctgcctatatctcagg-3'

ALPK3<sup>R1792X</sup>

External-F: 5'-gaagagtttggctctaggaatcc-3'

Screening-F: 5'-GTGCAGATTGCTACCAAgttgt-3'

External-R: 5'-ATCAGTAATAGCTGCCACACC-3'

Mouse Alpk3<sup>W1538X</sup>

Genotype-F: 5'-ACCAGGGCATGTTCTCTGTGG-3'

Genotype-R: 5'-TGTGGGCTTTGAACTGGACTCC-3'
