# Supplementary material for: Alpha kinase 3 signaling at the M-band maintains sarcomere integrity and proteostasis in striated muscle
Source: PubMed Central journal article supplement (PMC11358020; doi:10.1038/s44161-023-00219-9), 2023-02-15

Uncropped WB Images for Figure 5

Figure 5D

|            |   |   |   |   |   |   |   |   |                         |
|------------|---|---|---|---|---|---|---|---|-------------------------|
| ALPK3-FLAG | - | + | - | + | - | + | - | + |                         |
| SQSTM1-HA  | - | - | + | + | - | - | + | + | Unrelated to experiment |

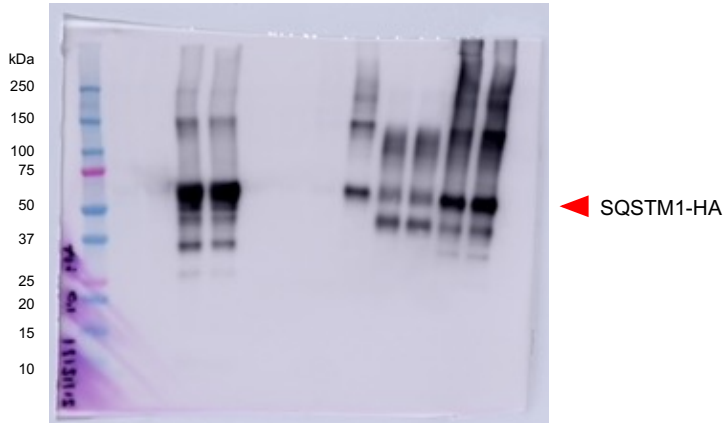

Figure 5F

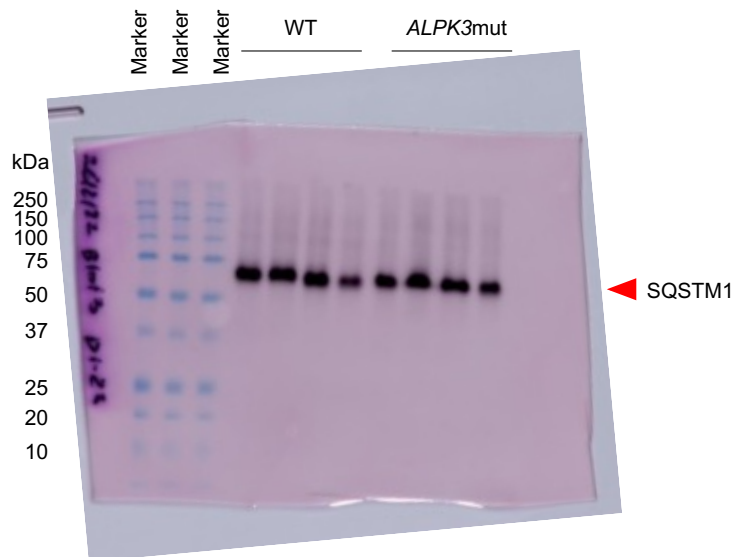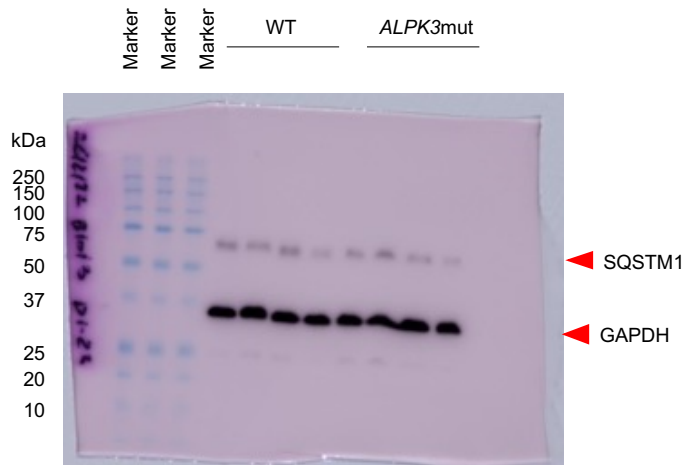

Supplement: 44161_2023_219_MOESM11_ESM.pdf [file 44161_2023_219_MOESM11_ESM.pdf]
