# Supplementary material for: Alpha kinase 3 signaling at the M-band maintains sarcomere integrity and proteostasis in striated muscle
Source: PubMed Central journal article supplement (PMC11358020; doi:10.1038/s44161-023-00219-9), 2023-02-15

Uncropped WB images for Extended Data Figure 2

Extended Data Figure 2E

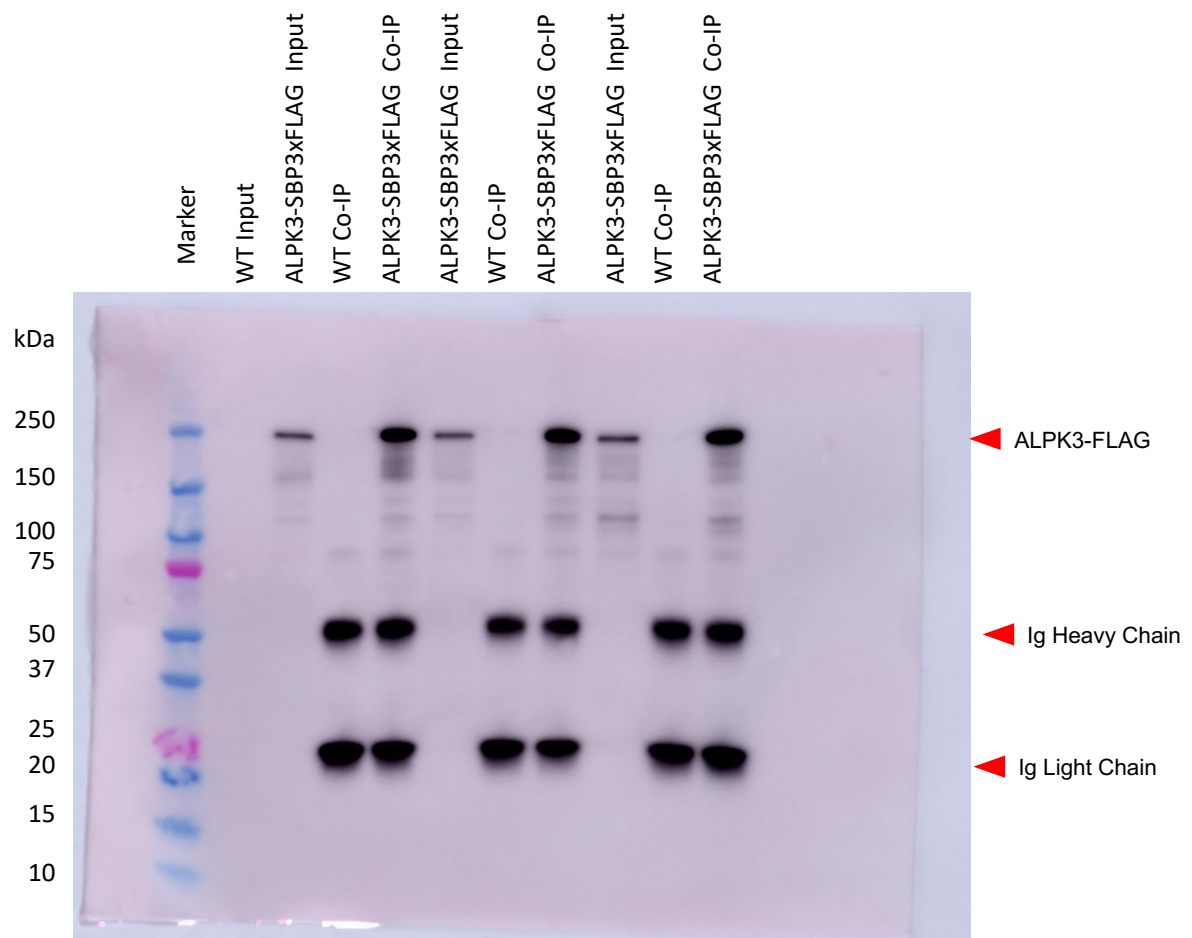

Supplement: 44161_2023_219_MOESM12_ESM.pdf [file 44161_2023_219_MOESM12_ESM.pdf]
