# Supplementary material for: Alpha kinase 3 signaling at the M-band maintains sarcomere integrity and proteostasis in striated muscle
Source: PubMed Central journal article supplement (PMC11358020; doi:10.1038/s44161-023-00219-9), 2023-02-15

# Uncropped Western Blots for Extended Data Figure 9

## Extended Data Figure 9B

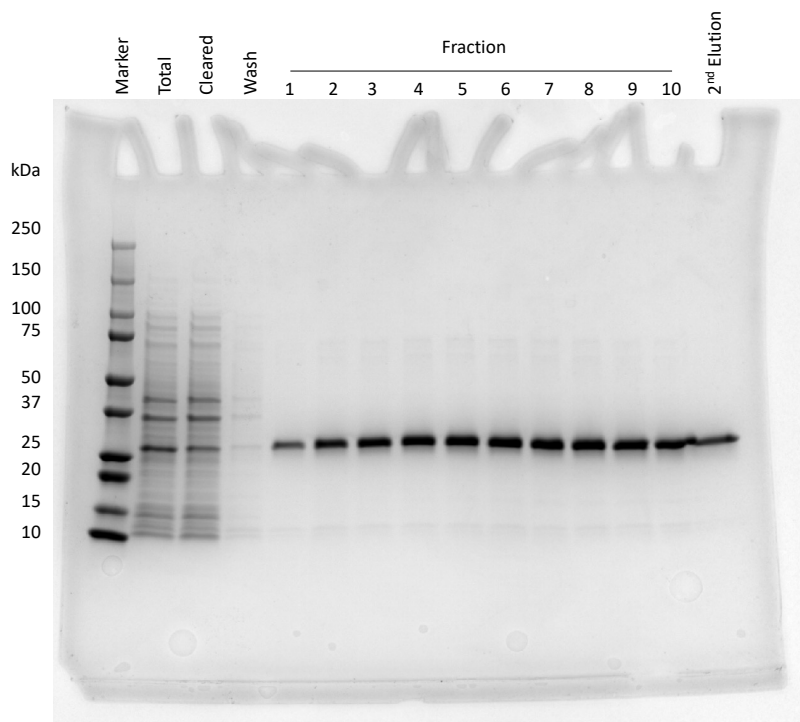

## Extended Data Figure 9C

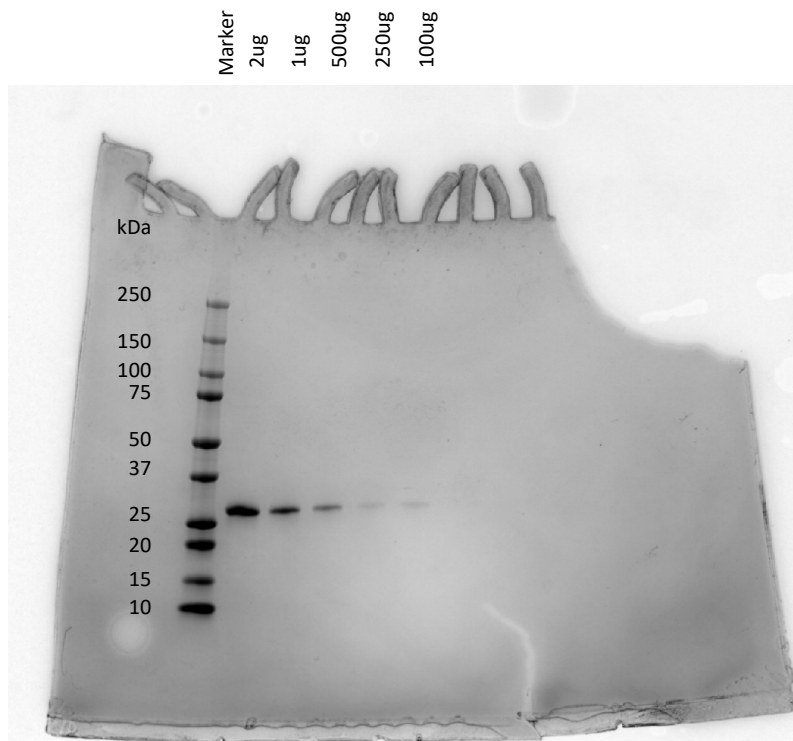

Extended Data Figure 9E

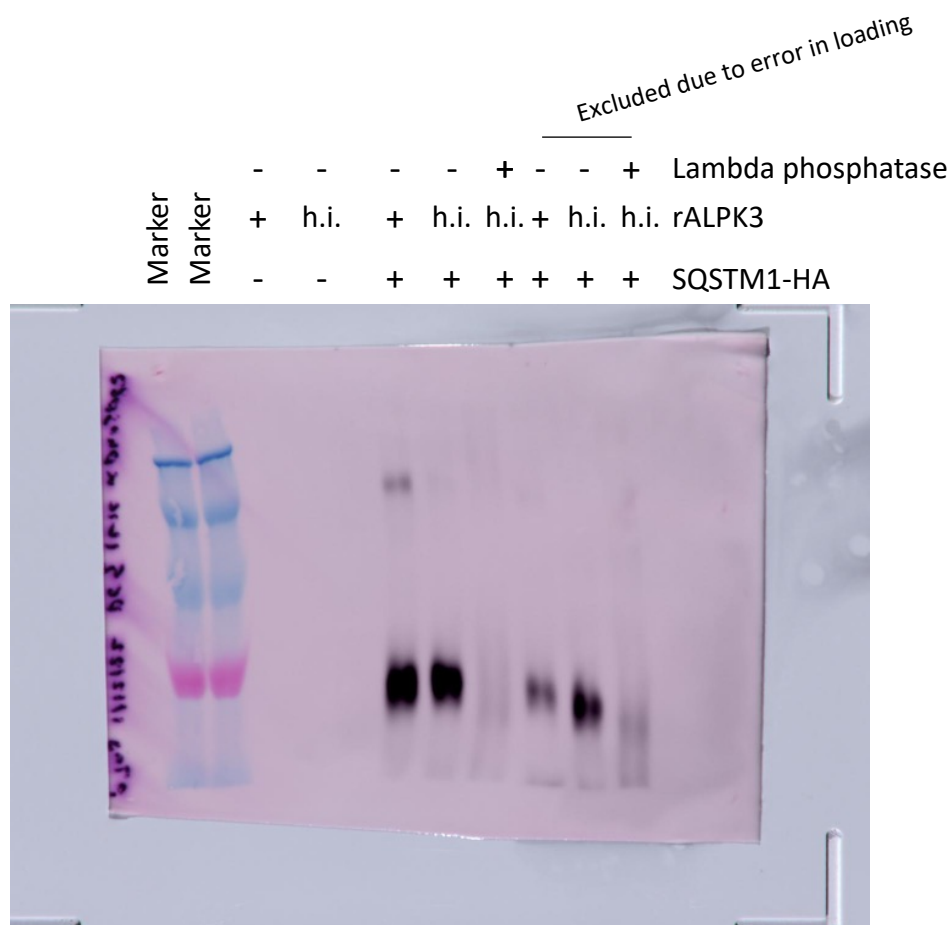

Extended Data Figure 9F

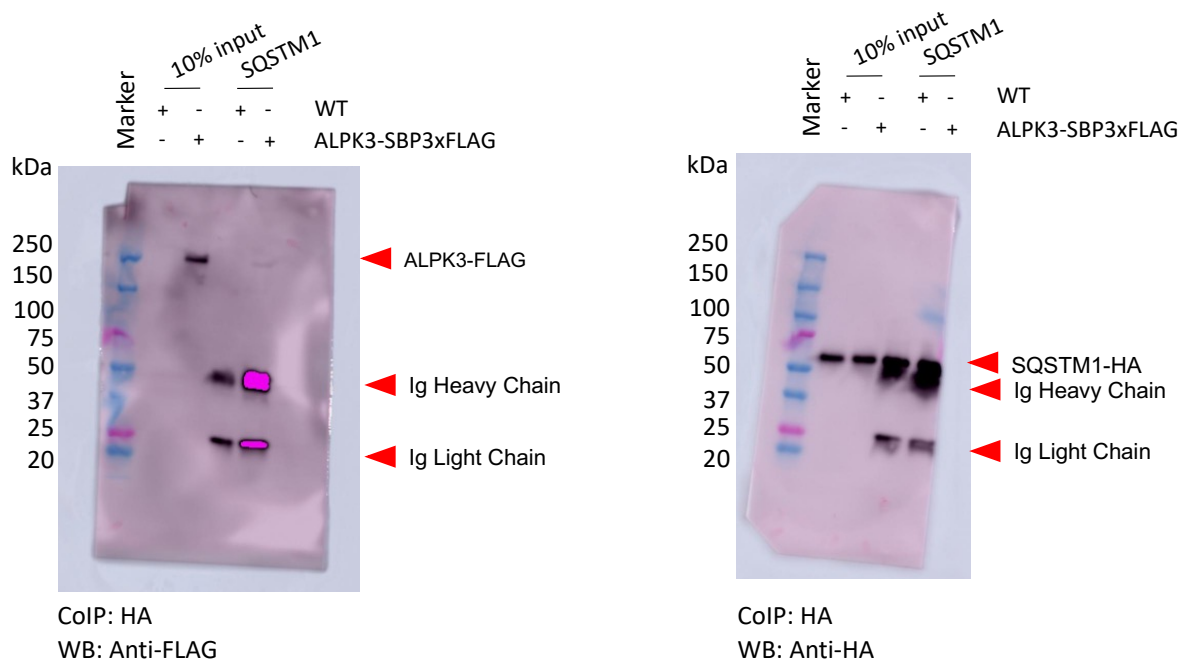

Supplement: 44161_2023_219_MOESM18_ESM.pdf [file 44161_2023_219_MOESM18_ESM.pdf]
